# Supplementary material for: Systems mapping: how to improve the genetic mapping of complex traits through design principles of biological systems
Source: Springer Nature journal article supplement (doi:10.1186/1752-0509-5-84), 2011-01-01

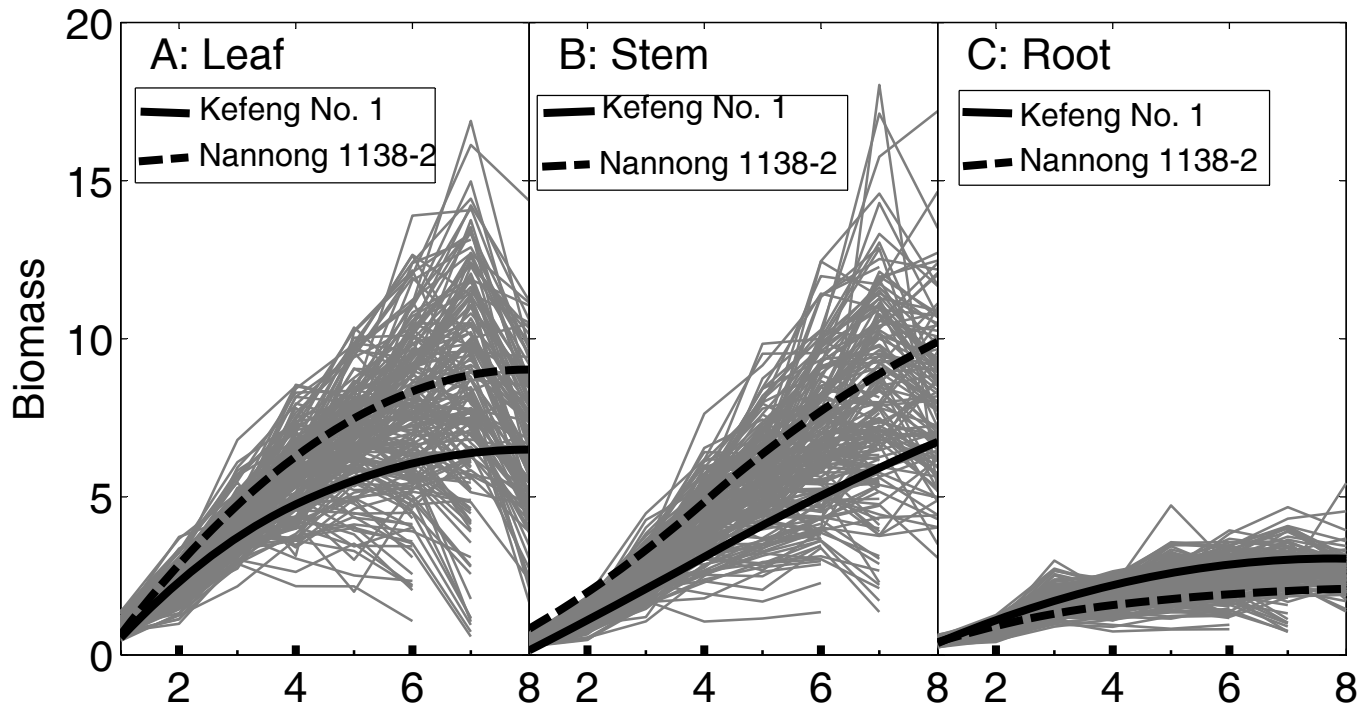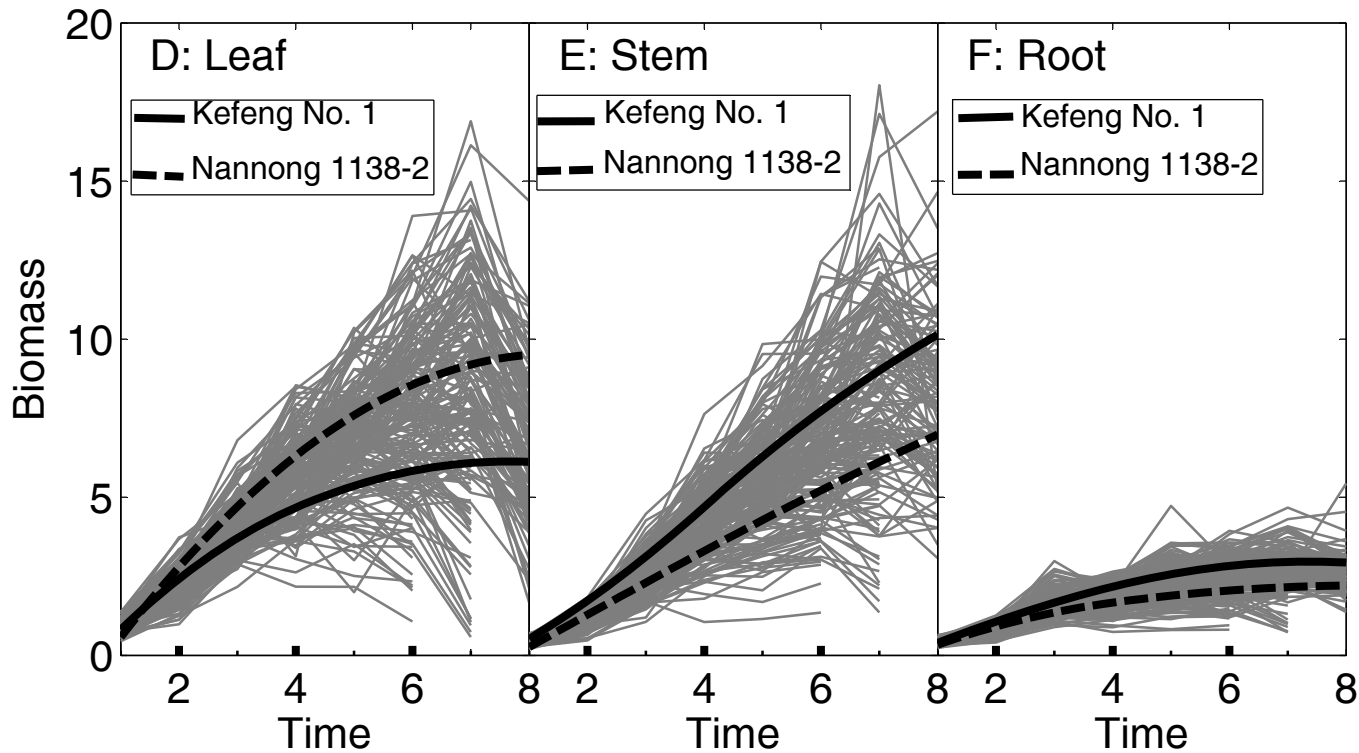

Supplement: 12918_2011_695_MOESM3_ESM.pdf [file 12918_2011_695_MOESM3_ESM.pdf]
