# Supplementary material for: Systems mapping: how to improve the genetic mapping of complex traits through design principles of biological systems
Source: Springer Nature journal article supplement (doi:10.1186/1752-0509-5-84), 2011-01-01

Kefeng No.1 Alleles

Nannong 1138-2 Alleles

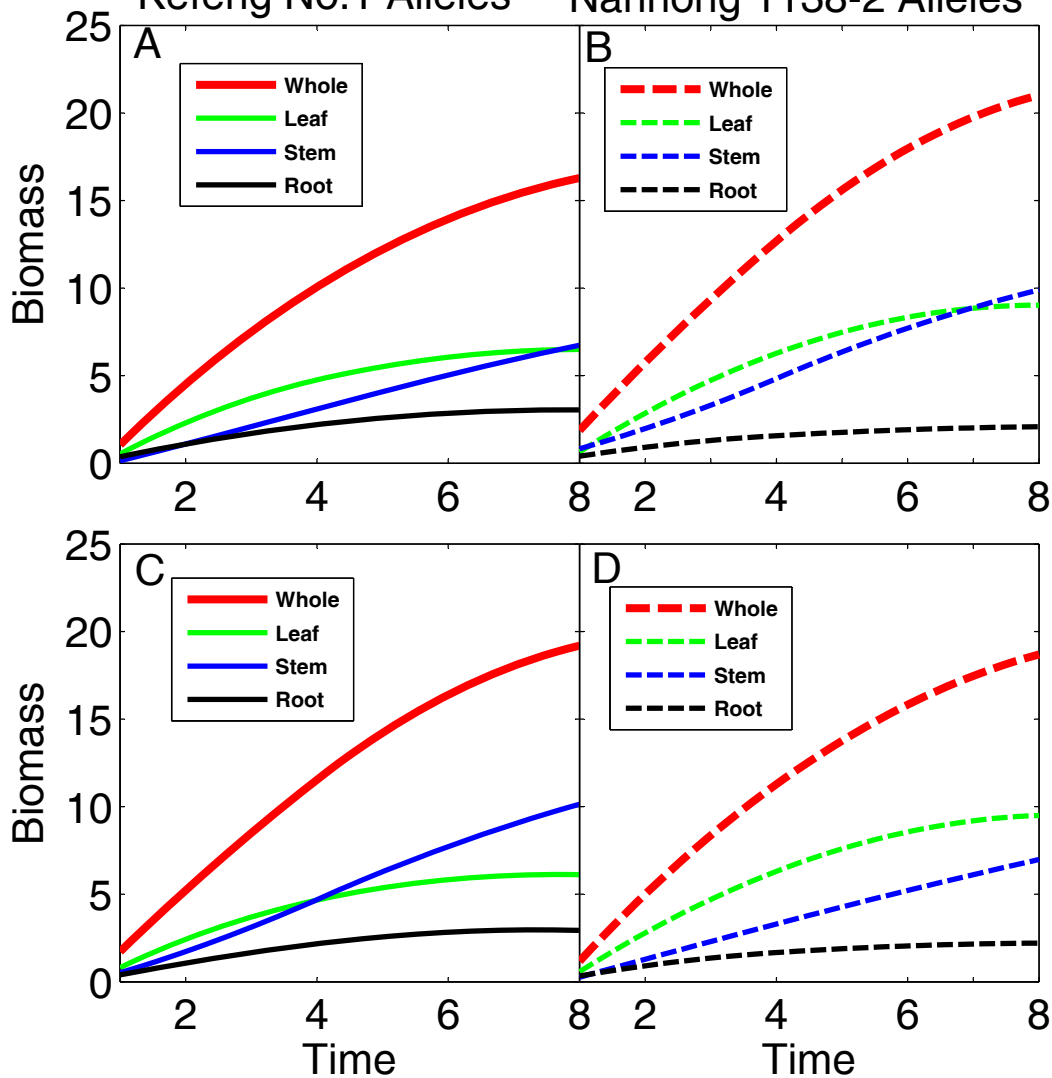

Supplement: 12918_2011_695_MOESM4_ESM.pdf [file 12918_2011_695_MOESM4_ESM.pdf]
